# Supplementary material for: Metal-directed self-assembly of transition metal heterometallascorpionates
Source: Royal Society of Chemistry journal article supplement (doi:10.1039/c9dt00683d), 2019-01-01
Supplement: c9dt00683d1.pdf [file c9dt00683d1.pdf]

Supporting information

for

## Metal-Directed Self-Assembly of Transition Metal Heterometallicscorpionates

Jesús Pastor-Medrano,<sup>c\*</sup> Francisco R. Rodríguez-Raya,<sup>a,b</sup> Erandi Bernabé-Pablo,<sup>a,b</sup> Daniel A. Mireles-Chávez,<sup>b,c</sup> Vojtech Jancik,<sup>a,b</sup> Diego Martínez-Otero<sup>a,b</sup> and Mónica Moya-Cabrera<sup>a,b\*</sup>

<sup>a</sup> Universidad Nacional Autónoma de México, Instituto de Química, Ciudad Universitaria, Ciudad de México, 04510, México.

<sup>b</sup> Centro Conjunto de Investigación en Química Sustentable UAEM-UNAM, Carretera Toluca-Atlaconulco Km. 14.5, Toluca, 50200, Estado de México, México.

<sup>c</sup> Facultad de Química, Universidad Autónoma del Estado de México, Paseo Tollocan y Colón, Toluca, 50120, Estado de México, México.

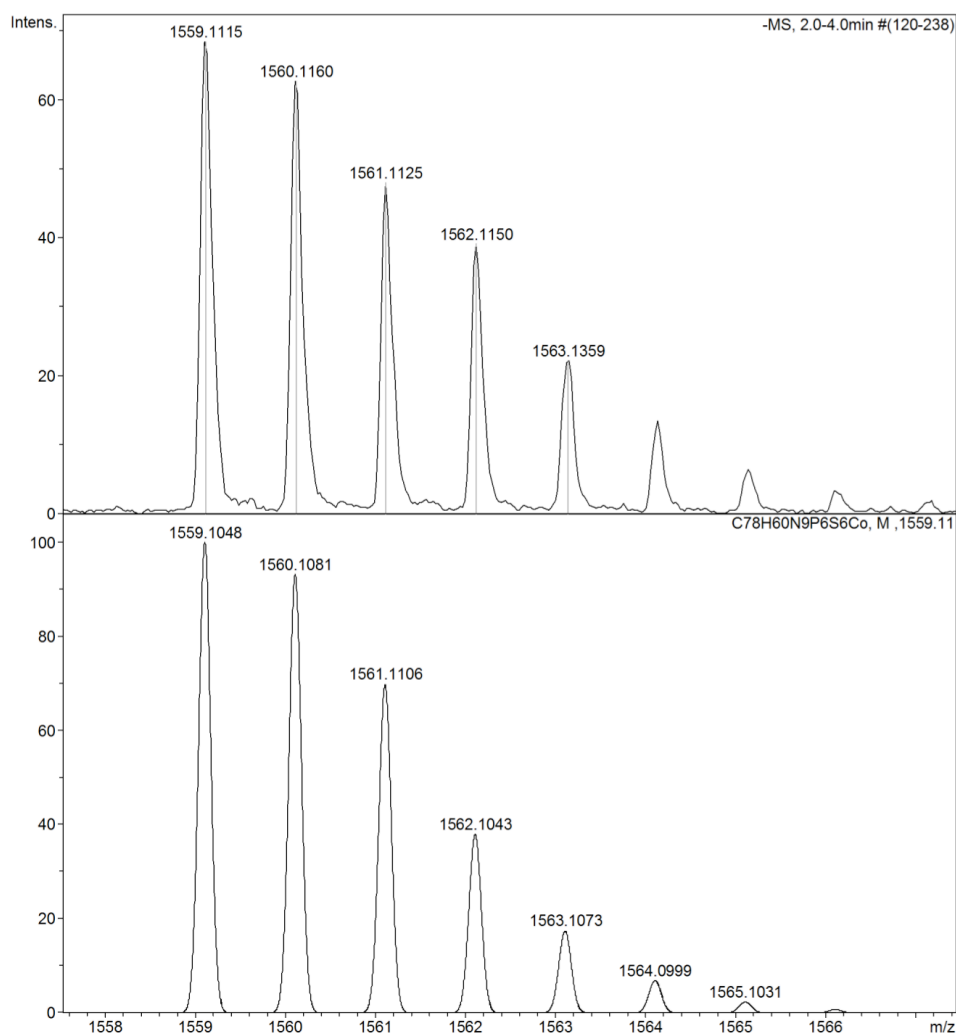

**Figure S1.** Experimental isotopic pattern for the  $[M-K(thf)_2]^-$  peak in the high resolution ESI(-) mass spectrum of **3** (top) and the simulated isotopic pattern for the same fragment (bottom).

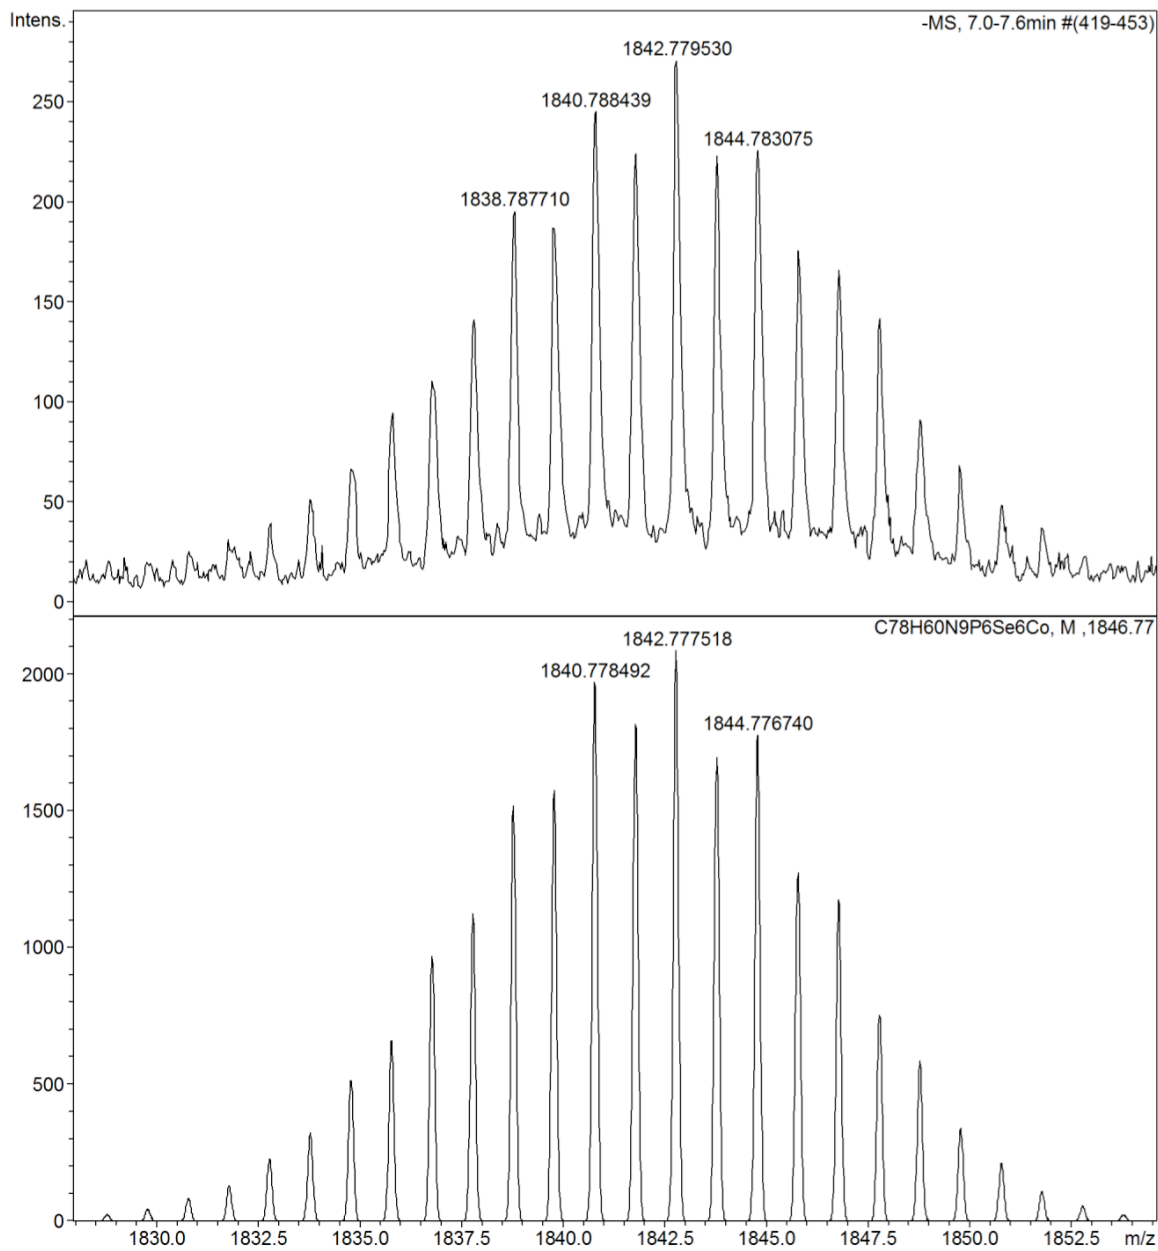

**Figure S2.** Experimental isotopic pattern for the  $[M-K(thf)_2]^-$  peak in the high resolution ESI(-) mass spectrum of **4** (top) and the simulated isotopic pattern for the same fragment (bottom).

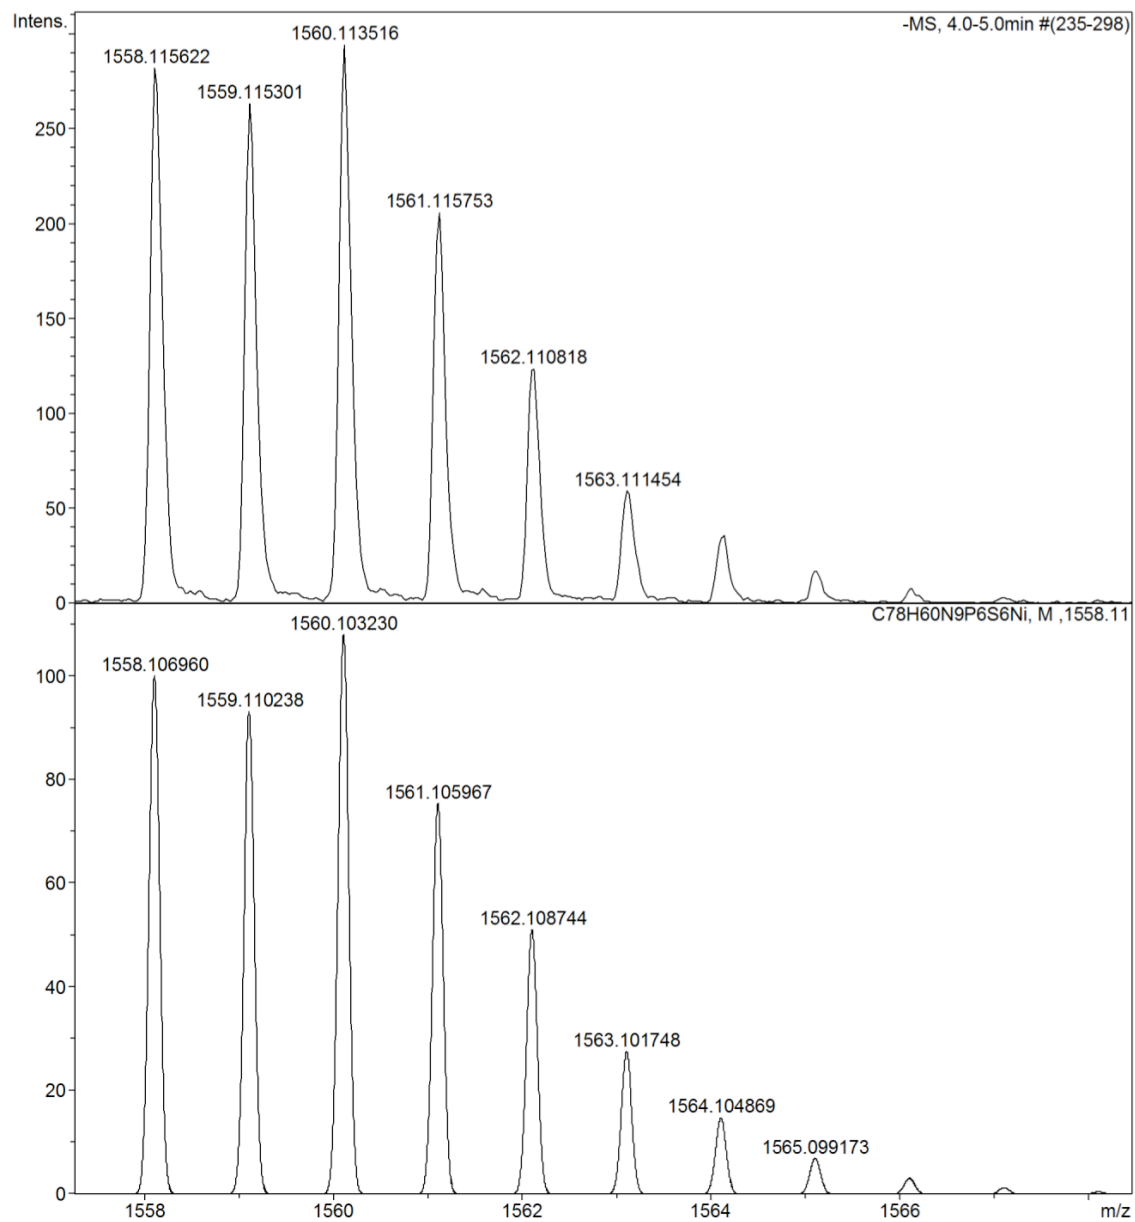

**Figure S3.** Experimental isotopic pattern for the  $[M-K(thf)_2]^-$  peak in the high resolution ESI(-) mass spectrum of **5** (top) and the simulated isotopic pattern for the same fragment (bottom).

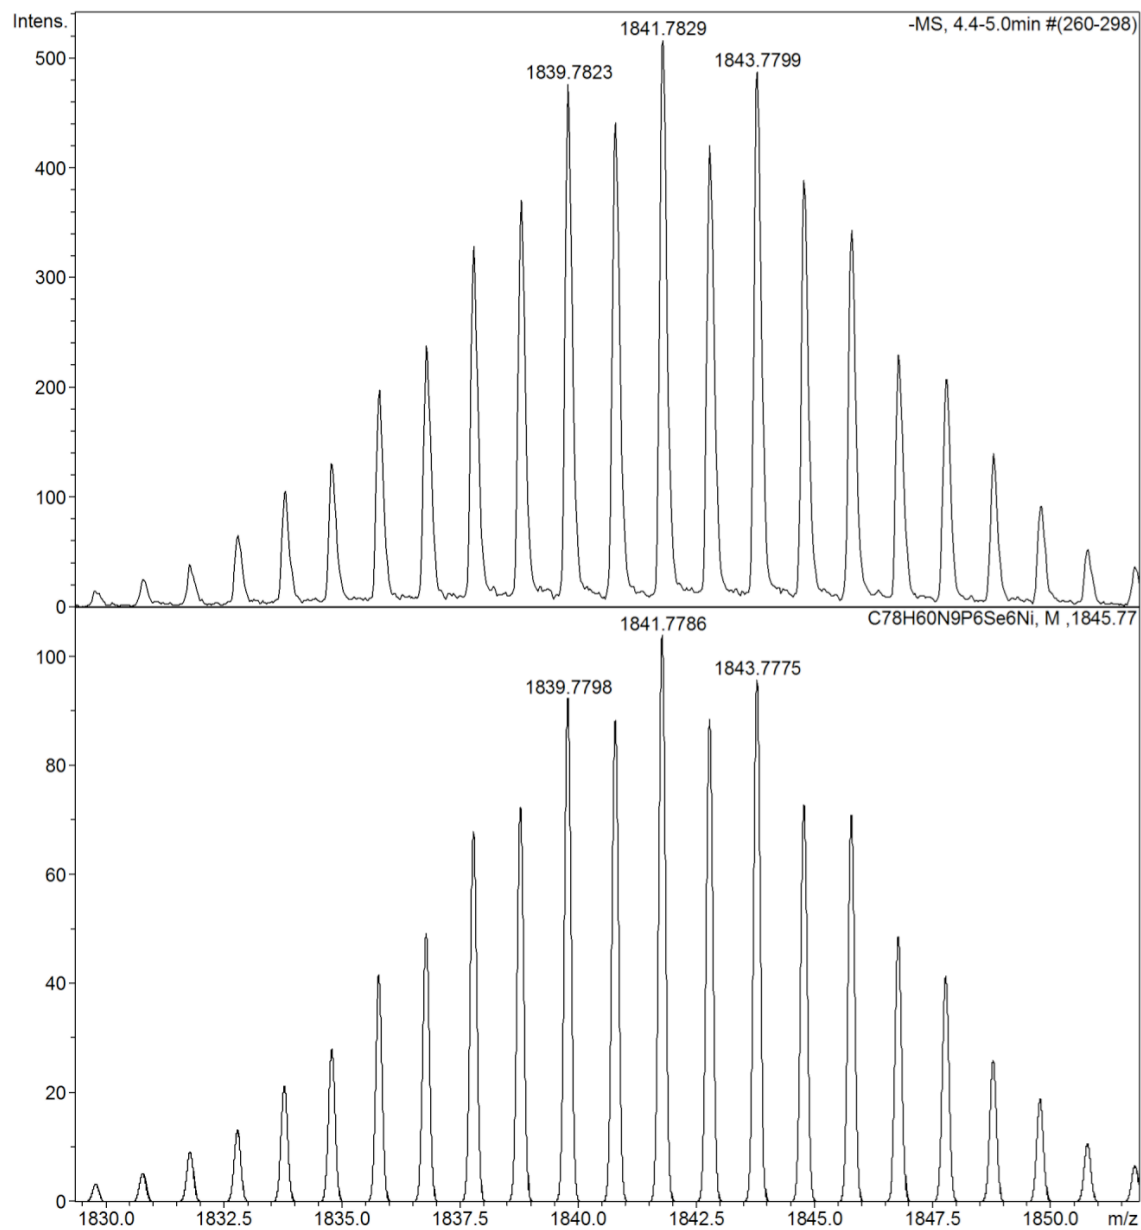

**Figure S4.** Experimental isotopic pattern for the  $[M-K(thf)_2]^-$  peak in the high resolution ESI(-) mass spectrum of **6** (top) and the simulated isotopic pattern for the same fragment (bottom).

**Table S1.** Crystal data and structure refinement details for compounds **3–6**

|                                                                                                               | <b>3</b> ·1.696THF·0.<br>304CH <sub>2</sub> Cl <sub>2</sub>                                                                                                       | <b>4</b> ·2THF                                                                                                                      | <b>5</b> ·1.184THF·0.216<br>CH <sub>2</sub> Cl <sub>2</sub>                                                                                                    | <b>6</b> ·2THF                                                                                                                      |
|---------------------------------------------------------------------------------------------------------------|-------------------------------------------------------------------------------------------------------------------------------------------------------------------|-------------------------------------------------------------------------------------------------------------------------------------|----------------------------------------------------------------------------------------------------------------------------------------------------------------|-------------------------------------------------------------------------------------------------------------------------------------|
| Empirical formula                                                                                             | C <sub>179.09</sub> H <sub>166.18</sub> Cl <sub>0.61</sub><br>Co <sub>2</sub> K <sub>2</sub> N <sub>18</sub> O <sub>5.70</sub><br>P <sub>12</sub> S <sub>12</sub> | C <sub>180</sub> H <sub>168</sub> Co <sub>2</sub> K <sub>2</sub> N <sub>18</sub><br>O <sub>6</sub> P <sub>12</sub> Se <sub>12</sub> | C <sub>179.35</sub> H <sub>166.70</sub> Cl <sub>0.43</sub> K <sub>2</sub><br>N <sub>18</sub> Ni <sub>2</sub> O <sub>5.78</sub> P <sub>12</sub> S <sub>12</sub> | C <sub>180</sub> H <sub>168</sub> K <sub>2</sub> N <sub>18</sub> Ni <sub>2</sub> O <sub>6</sub> P <sub>12</sub><br>Se <sub>12</sub> |
| Formula weight                                                                                                | 3635.80                                                                                                                                                           | 4194.54                                                                                                                             | 3633.87                                                                                                                                                        | 4194.10                                                                                                                             |
| Space group                                                                                                   | Triclinic                                                                                                                                                         | Triclinic                                                                                                                           | Triclinic                                                                                                                                                      | Triclinic                                                                                                                           |
| Crystal system                                                                                                | <i>P</i> $\bar{1}$                                                                                                                                                | <i>P</i> $\bar{1}$                                                                                                                  | <i>P</i> $\bar{1}$                                                                                                                                             | <i>P</i> $\bar{1}$                                                                                                                  |
| <i>a</i> /Å                                                                                                   | 16.0136(4)                                                                                                                                                        | 16.1262(6)                                                                                                                          | 15.9889(6)                                                                                                                                                     | 16.1143(3)                                                                                                                          |
| <i>b</i> /Å                                                                                                   | 16.3827(4)                                                                                                                                                        | 16.3809(6)                                                                                                                          | 16.2392(6)                                                                                                                                                     | 16.3352(3)                                                                                                                          |
| <i>c</i> /Å                                                                                                   | 20.3288(5)                                                                                                                                                        | 20.5889(7)                                                                                                                          | 20.4481(7)                                                                                                                                                     | 20.6585(4)                                                                                                                          |
| $\alpha$ /°                                                                                                   | 67.641(1)                                                                                                                                                         | 67.647(1)                                                                                                                           | 67.523(1)                                                                                                                                                      | 67.608(1)                                                                                                                           |
| $\beta$ /°                                                                                                    | 88.941(1)                                                                                                                                                         | 89.772(1)                                                                                                                           | 89.428(1)                                                                                                                                                      | 89.713(1)                                                                                                                           |
| $\gamma$ /°                                                                                                   | 62.375(1)                                                                                                                                                         | 62.696(1)                                                                                                                           | 62.557(1)                                                                                                                                                      | 62.413(1)                                                                                                                           |
| <i>V</i> /Å <sup>3</sup>                                                                                      | 4288.04(18)                                                                                                                                                       | 4372.5(3)                                                                                                                           | 4263.5(3)                                                                                                                                                      | 4357.72(14)                                                                                                                         |
| Temperature/K                                                                                                 | 100(2)                                                                                                                                                            | 100(2)                                                                                                                              | 100(2)                                                                                                                                                         | 100(2)                                                                                                                              |
| Wavelength/Å                                                                                                  | 0.71073                                                                                                                                                           | 0.71073                                                                                                                             | 0.71073                                                                                                                                                        | 0.71073                                                                                                                             |
| <i>Z</i>                                                                                                      | 1                                                                                                                                                                 | 1                                                                                                                                   | 1                                                                                                                                                              | 1                                                                                                                                   |
| $\rho$ (calc.)/g cm <sup>-3</sup>                                                                             | 1.408                                                                                                                                                             | 1.593                                                                                                                               | 1.415                                                                                                                                                          | 1.598                                                                                                                               |
| $\mu$ (mm <sup>-1</sup> )                                                                                     | 0.572                                                                                                                                                             | 2.906                                                                                                                               | 0.599                                                                                                                                                          | 2.942                                                                                                                               |
| Crystal size/mm <sup>3</sup>                                                                                  | 0.18x0.13 x 0.12                                                                                                                                                  | 0.15 x 0.14 x 0.09                                                                                                                  | 0.26 x 0.19 x 0.18                                                                                                                                             | 0.11 x 0.07 x 0.07                                                                                                                  |
| Refl. collected                                                                                               | 111939                                                                                                                                                            | 50814                                                                                                                               | 117974                                                                                                                                                         | 64282                                                                                                                               |
| Unique refl. ( <i>R</i> <sub>int</sub> )                                                                      | 16862 (0.0290)                                                                                                                                                    | 17239 (0.0460)                                                                                                                      | 18120 (0.0445)                                                                                                                                                 | 19979 (0.0423)                                                                                                                      |
| <i>R</i> <sub>1</sub> , <sup>a</sup> <i>wR</i> <sub>2</sub> <sup>b</sup> ( <i>I</i> >2 $\sigma$ ( <i>I</i> )) | 0.0304, 0.0745                                                                                                                                                    | 0.0399, 0.0817                                                                                                                      | 0.0440, 0.1003                                                                                                                                                 | 0.0365, 0.0714                                                                                                                      |
| <i>R</i> <sub>1</sub> , <sup>a</sup> <i>wR</i> <sub>2</sub> <sup>b</sup> (all data)                           | 0.0330, 0.0758                                                                                                                                                    | 0.0588, 0.0880                                                                                                                      | 0.0502, 0.1029                                                                                                                                                 | 0.0560, 0.0774                                                                                                                      |
| GoF                                                                                                           | 1.045                                                                                                                                                             | 1.020                                                                                                                               | 1.115                                                                                                                                                          | 1.018                                                                                                                               |

$$^a R_1 = \frac{\sum ||F_o| - |F_c||}{\sum |F_o|}, \quad ^b wR_2 = [\frac{\sum w(F_o^2 - F_c^2)^2}{\sum (F_o^2)^2}]^{1/2}$$

**Table S2.** Crystal data and structure refinement details of compounds **3a**, **3b**, **4a** and **4b**.

|                                                                                                                | <b>3a</b>                                                                                                                          | <b>3b</b>                                                                                                                          | <b>4a</b>                                                                                                                           | <b>4b</b>                                                                                                                           |
|----------------------------------------------------------------------------------------------------------------|------------------------------------------------------------------------------------------------------------------------------------|------------------------------------------------------------------------------------------------------------------------------------|-------------------------------------------------------------------------------------------------------------------------------------|-------------------------------------------------------------------------------------------------------------------------------------|
| Empirical formula                                                                                              | C <sub>180</sub> H <sub>168</sub> Co <sub>2</sub> K <sub>2</sub> N <sub>18</sub><br>O <sub>6</sub> P <sub>12</sub> S <sub>12</sub> | C <sub>180</sub> H <sub>168</sub> Co <sub>2</sub> K <sub>2</sub> N <sub>18</sub><br>O <sub>6</sub> P <sub>12</sub> S <sub>12</sub> | C <sub>180</sub> H <sub>168</sub> Co <sub>2</sub> K <sub>2</sub> N <sub>18</sub><br>O <sub>6</sub> P <sub>12</sub> Se <sub>12</sub> | C <sub>180</sub> H <sub>168</sub> Co <sub>2</sub> K <sub>2</sub> N <sub>18</sub><br>O <sub>6</sub> P <sub>12</sub> Se <sub>12</sub> |
| Formula weight                                                                                                 | 3631.73                                                                                                                            | 3631.73                                                                                                                            | 4194.53                                                                                                                             | 4194.10                                                                                                                             |
| Space group                                                                                                    | Triclinic                                                                                                                          | Triclinic                                                                                                                          | Triclinic                                                                                                                           | Triclinic                                                                                                                           |
| Crystal system                                                                                                 | <i>P</i> $\bar{1}$                                                                                                                 | <i>P</i> $\bar{1}$                                                                                                                 | <i>P</i> $\bar{1}$                                                                                                                  | <i>P</i> $\bar{1}$                                                                                                                  |
| <i>a</i> /Å                                                                                                    | 16.0185(15)                                                                                                                        | 16.128(4)                                                                                                                          | 16.1384(8)                                                                                                                          | 16.2092(15)                                                                                                                         |
| <i>b</i> /Å                                                                                                    | 16.1962(16)                                                                                                                        | 16.427(6)                                                                                                                          | 16.3880(8)                                                                                                                          | 16.4743(16)                                                                                                                         |
| <i>c</i> /Å                                                                                                    | 20.537(2)                                                                                                                          | 20.759(5)                                                                                                                          | 20.6000(11)                                                                                                                         | 20.887(2)                                                                                                                           |
| $\alpha$ /°                                                                                                    | 67.0861(16)                                                                                                                        | 67.734(4)                                                                                                                          | 67.7161(8)                                                                                                                          | 67.8293(16)                                                                                                                         |
| $\beta$ /°                                                                                                     | 89.5626(18)                                                                                                                        | 89.760(5)                                                                                                                          | 89.7051(9)                                                                                                                          | 90.0911(17)                                                                                                                         |
| $\gamma$ /°                                                                                                    | 63.0038(16)                                                                                                                        | 62.594(4)                                                                                                                          | 62.5180(7)                                                                                                                          | 62.7076(15)                                                                                                                         |
| Unit cell volume/Å <sup>3</sup>                                                                                | 4279.1(7)                                                                                                                          | 4420.6(17)                                                                                                                         | 4375.7(4)                                                                                                                           | 4485.6(7)                                                                                                                           |
| Temperature/K                                                                                                  | 100(2)                                                                                                                             | 250(2)                                                                                                                             | 100(2)                                                                                                                              | 250(2)                                                                                                                              |
| Wavelength/ Å                                                                                                  | 0.71073                                                                                                                            | 0.71073                                                                                                                            | 0.71073                                                                                                                             | 0.71073                                                                                                                             |
| Z                                                                                                              | 1                                                                                                                                  | 2                                                                                                                                  | 1                                                                                                                                   | 1                                                                                                                                   |
| $\rho$ <sub>(calc.)</sub> /g cm <sup>-3</sup>                                                                  | 1.409                                                                                                                              | 1.364                                                                                                                              | 1.592                                                                                                                               | 1.553                                                                                                                               |
| $\mu$ (mm <sup>-1</sup> )                                                                                      | 0.564                                                                                                                              | 0.546                                                                                                                              | 2.904                                                                                                                               | 2.833                                                                                                                               |
| Crystal size/mm <sup>3</sup>                                                                                   | 0.62 x 0.35 x 0.30                                                                                                                 | 0.62 x 0.35 x 0.30                                                                                                                 | 0.31 x 0.27 x 0.21                                                                                                                  | 0.31 x 0.27 x 0.21                                                                                                                  |
| Refl. collected                                                                                                | 68343                                                                                                                              | 83197                                                                                                                              | 77713                                                                                                                               | 82031                                                                                                                               |
| Unique refl. ( <i>R</i> <sub>int</sub> )                                                                       | 17435 (0.0351)                                                                                                                     | 18069 (0.0201)                                                                                                                     | 19956 (0.0428)                                                                                                                      | 20461 (0.0261)                                                                                                                      |
| <i>R</i> <sub>1</sub> , <sup>a</sup> <i>wR</i> <sub>2</sub> <sup>b</sup> ( <i>I</i> > 2 $\sigma$ ( <i>I</i> )) | 0.0545, 0.1324                                                                                                                     | 0.0342, 0.0950                                                                                                                     | 0.0704, 0.1417                                                                                                                      | 0.0334, 0.0858                                                                                                                      |
| <i>R</i> <sub>1</sub> , <sup>a</sup> <i>wR</i> <sub>2</sub> <sup>b</sup> (all data)                            | 0.0596, 0.1356                                                                                                                     | 0.0393, 0.1000                                                                                                                     | 0.0796, 0.1454                                                                                                                      | 0.0430, 0.0914                                                                                                                      |
| GoF                                                                                                            | 1.092                                                                                                                              | 1.022                                                                                                                              | 1.186                                                                                                                               | 0.995                                                                                                                               |

$$^a R_1 = \sum ||F_o| - |F_c|| / \sum |F_o|. \quad ^b wR_2 = [\sum w(F_o^2 - F_c^2)^2 / \sum (F_o^2)^2]^{1/2}$$

**Table S3.** Selected bond lengths (Å) and angles (°) for **3a** and **4a** (collected at 100 K).

|                             | <b>3a</b>                    | <b>4a</b>                    |
|-----------------------------|------------------------------|------------------------------|
| Co–E                        | 2.507(1), 2.529(1), 2.545(1) | 2.653(1), 2.592(1), 2.635(4) |
| Co–N                        | 2.078(1), 2.085(1), 2.114(3) | 2.080(4), 2.092(4), 2.117(4) |
| P=E                         | 1.953(1), 1.958(1), 1.951(1) | 2.123(4), 2.102(1), 2.109(7) |
| P–E(Co)                     | 1.989(1), 1.984(1), 1.983(1) | 2.140(4), 2.131(2), 2.137(2) |
| Co···K                      | 3.864(1)                     | 3.856(1)                     |
| E–Co–E                      | 88.5(1), 87.8(1), 86.2(1)    | 88.0(2), 86.7(1), 85.3(1)    |
| N–Co–N                      | 94.5(1), 93.8(1), 99.4(1)    | 101.3(2), 94.5(3), 94.7(2)   |
| E–Co–N <sub>(endocyc)</sub> | 86.0(1), 84.8(1), 91.2(1)    | 87.3(1), 85.4(2), 85.6(1)    |
| E–Co–N <sub>(trans)</sub>   | 173.2(1), 173.2(1), 171.0(1) | 172.0(1), 172.0(2), 170.7(2) |
| P–E–Co                      | 99.4(1), 100.6(1), 99.0(1)   | 95.7(1), 95.2(1), 96.3(2)    |
| N–K–N                       | 90.8(1), 80.5(1), 81.1(1)    | 79.8(2), 80.3(1), 89.6(2)    |

**Table S4.** Selected bond lengths (Å) and angles (°) for **3b** and **4b** (collected at 250 K).

|                             | <b>3b</b>                    | <b>4b</b>                    |
|-----------------------------|------------------------------|------------------------------|
| Co–E                        | 2.570(1), 2.542(1), 2.500(1) | 2.664(1), 2.596(1), 2.634(4) |
| Co–N                        | 2.083(1), 2.089(1), 2.121(1) | 2.088(4), 2.093(2), 2.131(2) |
| P=E                         | 1.952(1), 1.954(1)           | 2.114(1), 2.103(1), 2.086(6) |
| P–E(Co)                     | 1.985(1), 1.984(1), 1.982(1) | 2.143(4), 2.134(1), 2.139(1) |
| Co···K                      | 3.885(1)                     | 3.877(1)                     |
| E–Co–E                      | 88.1(1), 88.3(1), 87.1(1)    | 87.5(2), 86.8(2), 84.8(1)    |
| N–Co–N                      | 94.2(1), 100.0(1), 95.1(1)   | 101.6(2), 94.7(1), 95.8(3)   |
| E–Co–N <sub>(endocyc)</sub> | 86.2(1), 84.7(1), 84.5(1)    | 87.0(1), 85.2(2), 85.5(1)    |
| E–Co–N <sub>(trans)</sub>   | 172.7(1), 171.8(1), 172.8(1) | 172.0(1), 171.3(1), 170.0(2) |
| P–E–Co                      | 99.5(1), 100.3(1), 98.9(1)   | 95.7(1), 95.3(1), 96.8(2)    |
| N–K–N                       | 90.8(1), 79.4(1), 80.9(1)    | 79.7(1), 79.3(1), 89.5(1)    |

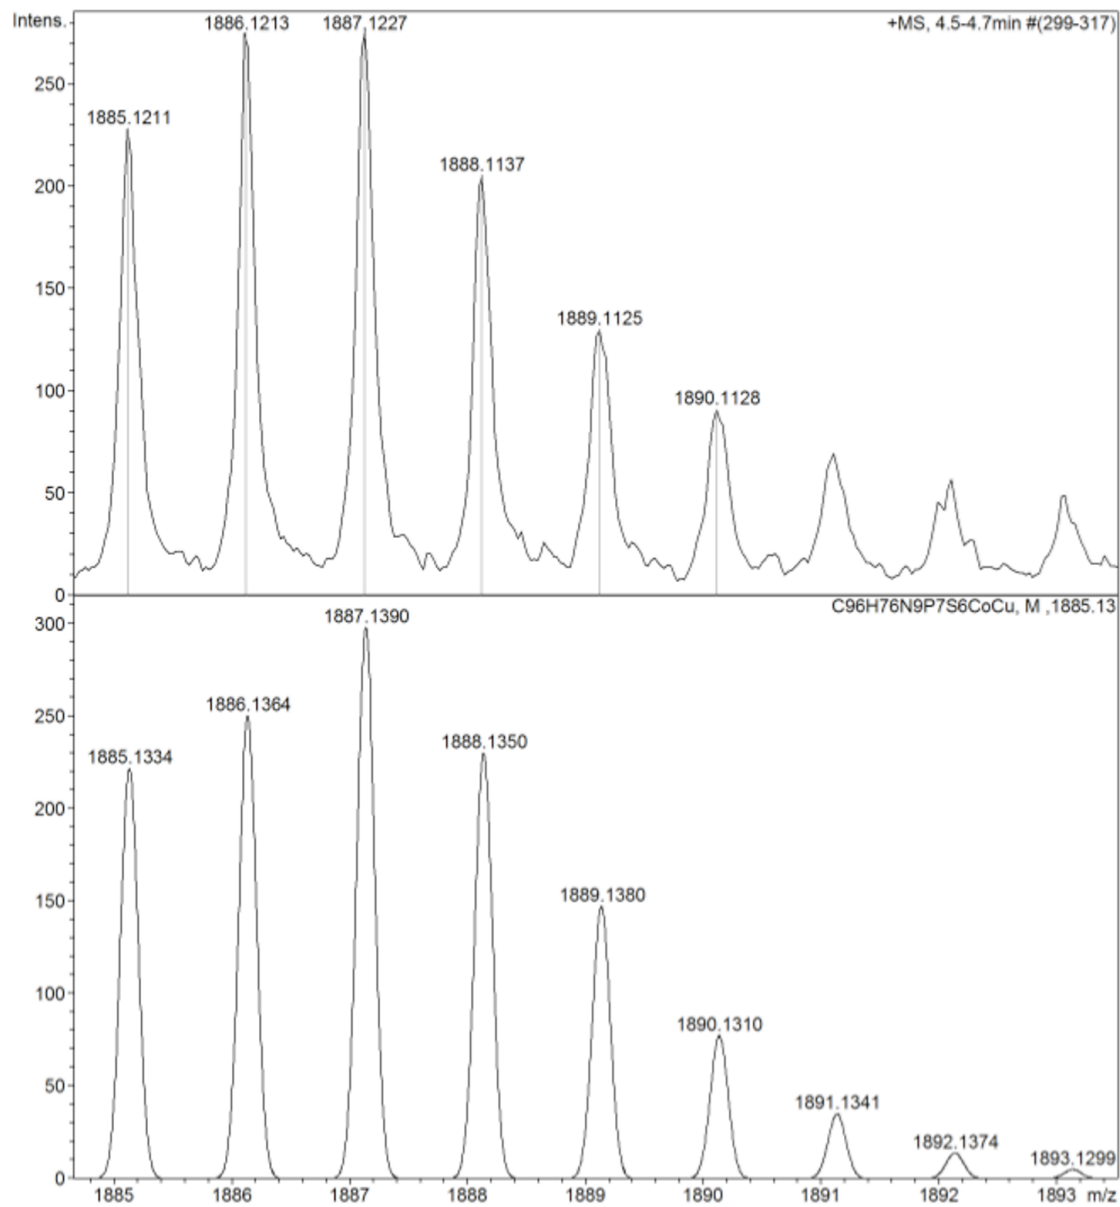

**Figure S5.** Experimental isotopic pattern for the  $[M+H]^+$  peak in the high resolution ESI(+) mass spectrum of **7** (top) and the simulated isotopic pattern for the same fragment (bottom).



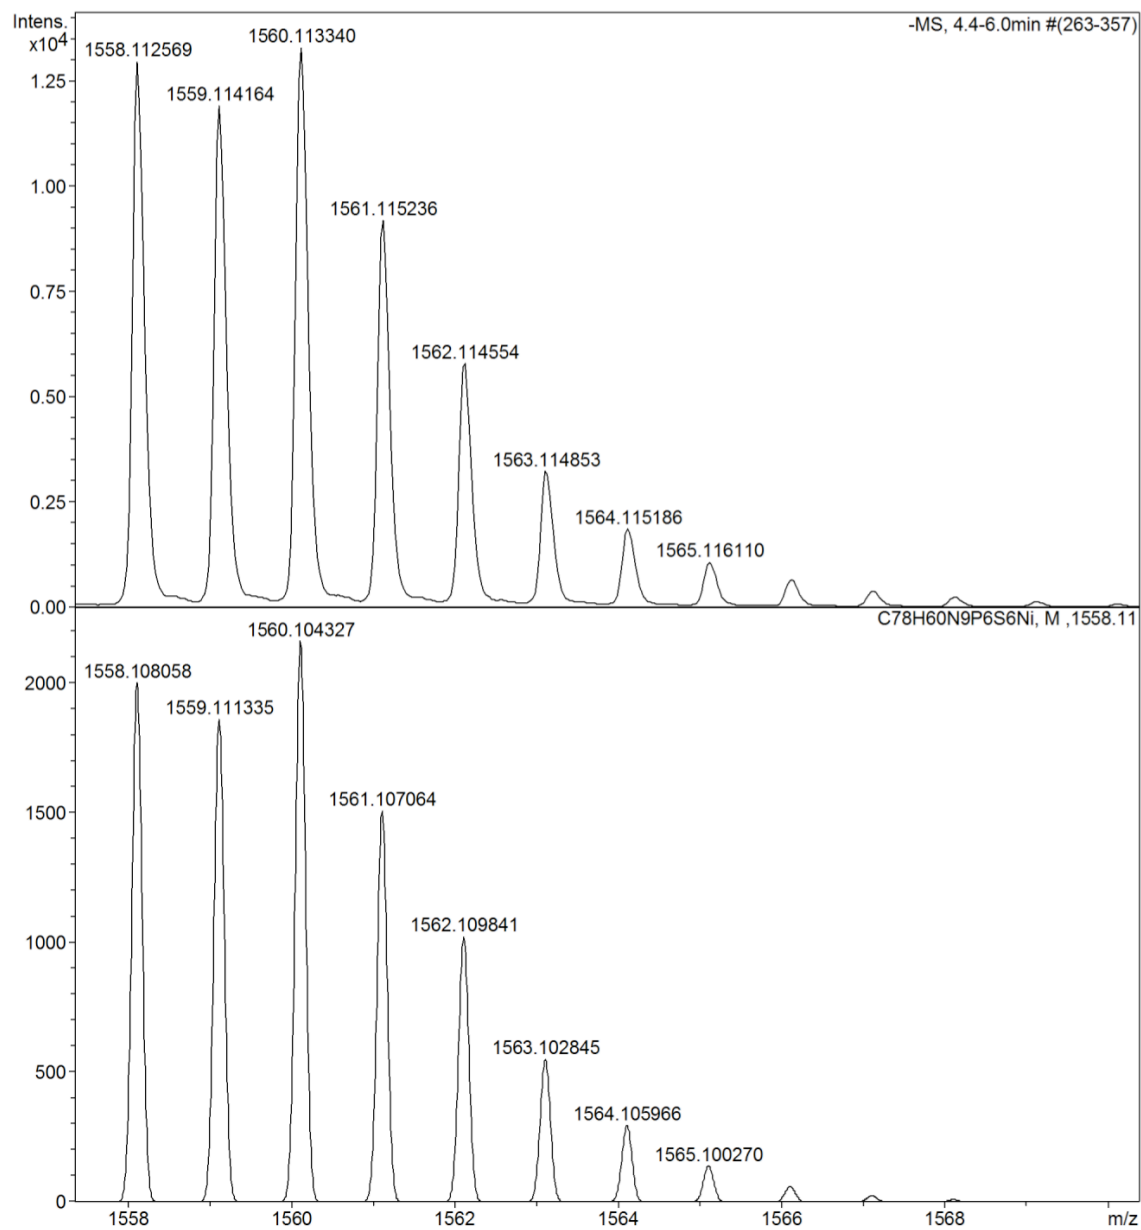

**Figure S6.** Experimental isotopic pattern for the  $[M-CuPPh_3]^-$  peak in the high resolution ESI(-) mass spectrum of **8** (top) and the simulated isotopic pattern for the same fragment (bottom).

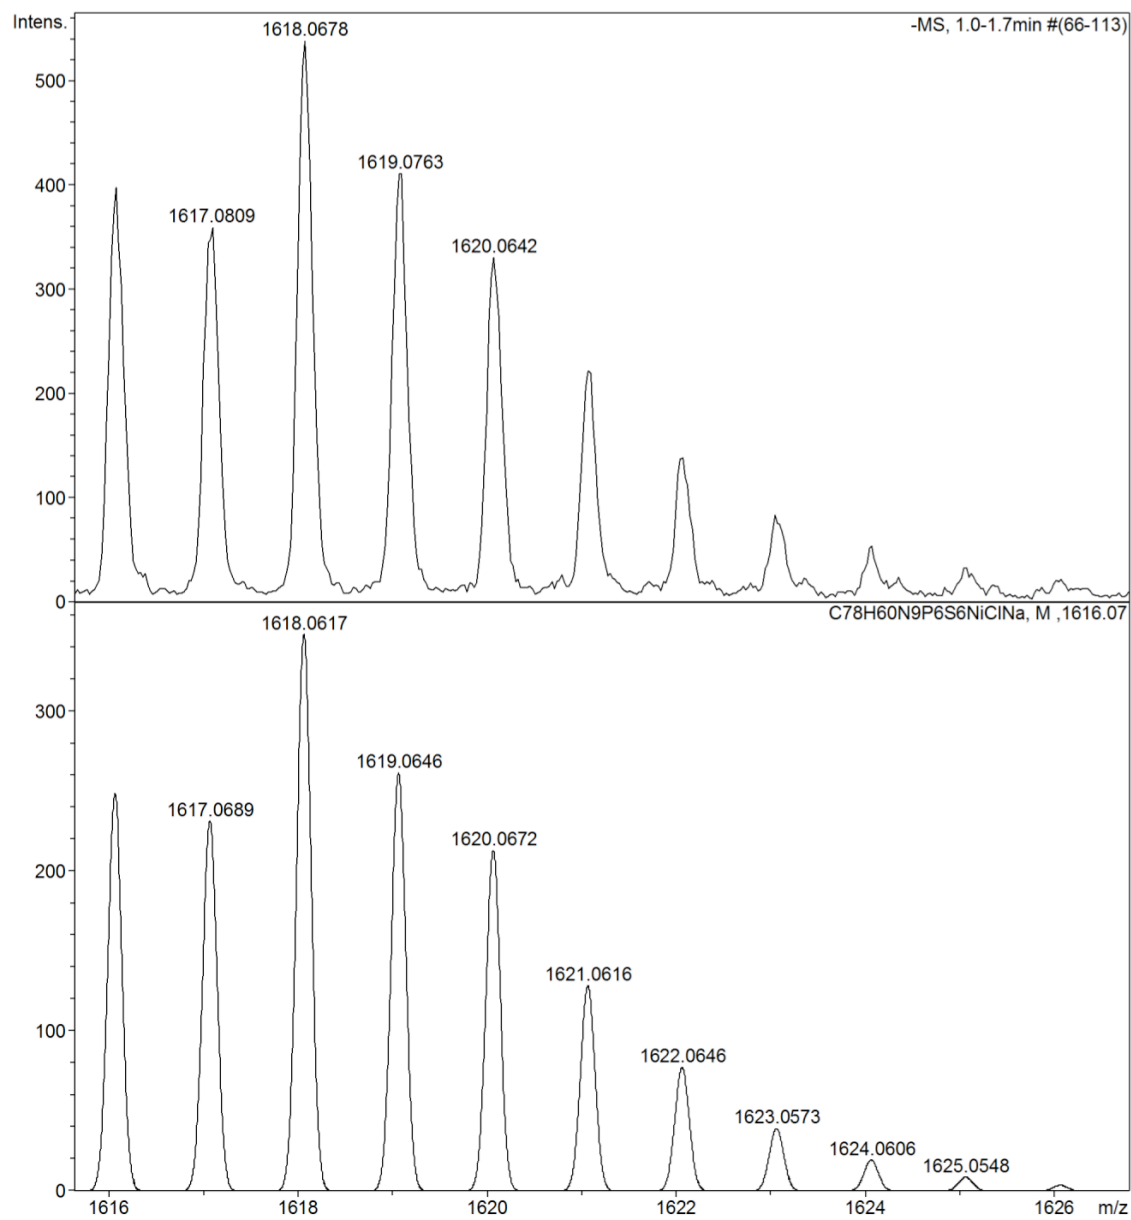

**Figure S7.** Experimental isotopic pattern for the  $[\text{Ni}(\text{L}^{\text{TzS}})_3 + \text{NaCl}]^-$  peak in the high resolution APCI(-) mass spectrum of **9** (top) and the simulated isotopic pattern for the same fragment (bottom).

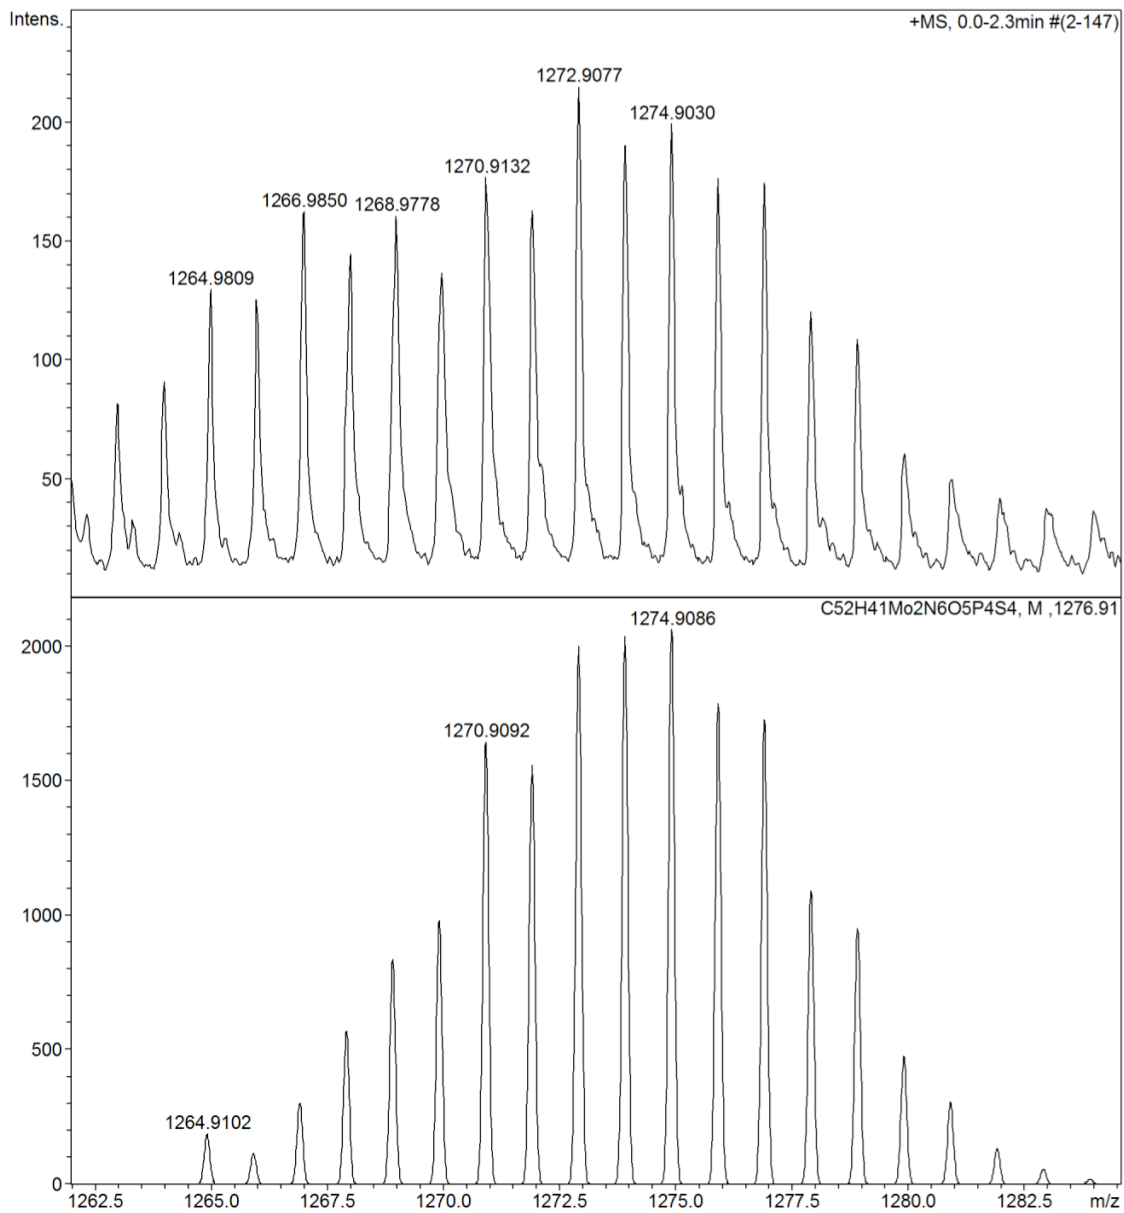

**Figure S8.** Experimental isotopic pattern for the  $[M+H]^+$  peak in the high resolution APCI(+) mass spectrum of **10** (top) and the simulated isotopic pattern for the same fragment (bottom).

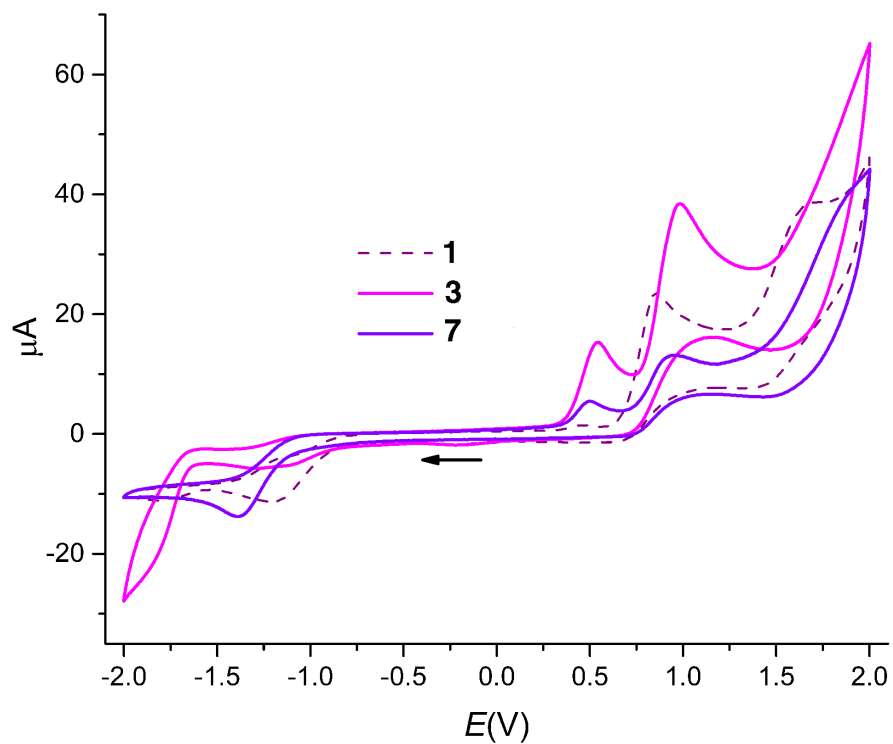

**Figure S9.** Cyclic voltammogram of compounds **3** and **7** against ligand **1** in  $\text{CH}_2\text{Cl}_2$  with 0.1 M  $[\text{NBu}_4][\text{ClO}_4]$  at a scan rate of  $0.05 \text{ V s}^{-1}$ .

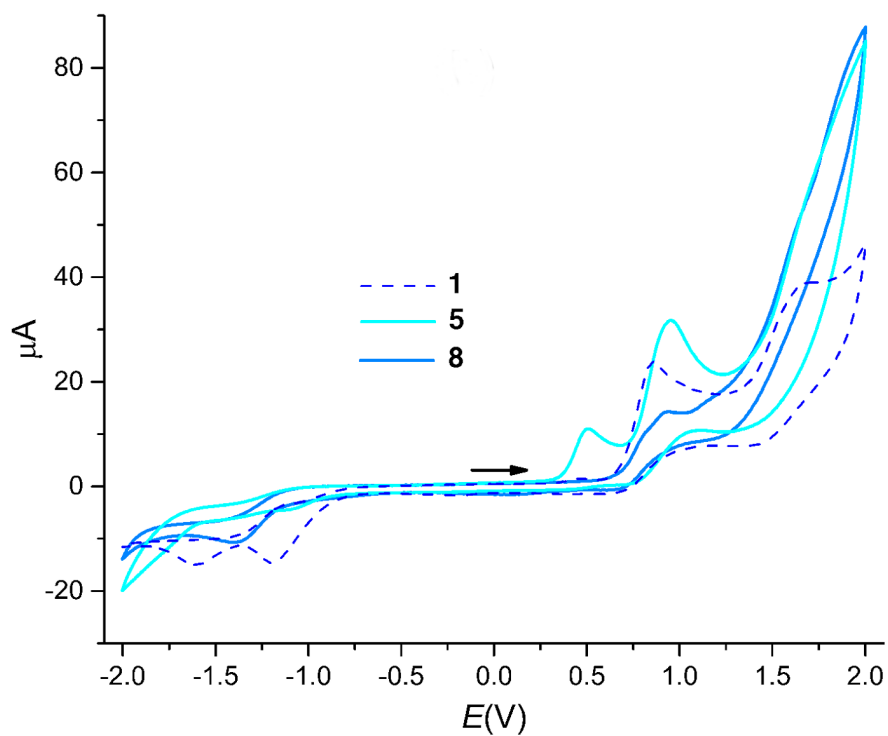

**Figure S10.** Cyclic voltammogram of compounds **5** and **8** against ligand **1** in  $\text{CH}_2\text{Cl}_2$  with 0.1 M  $[\text{NBu}_4][\text{ClO}_4]$  at a scan rate of  $0.05 \text{ V s}^{-1}$ .

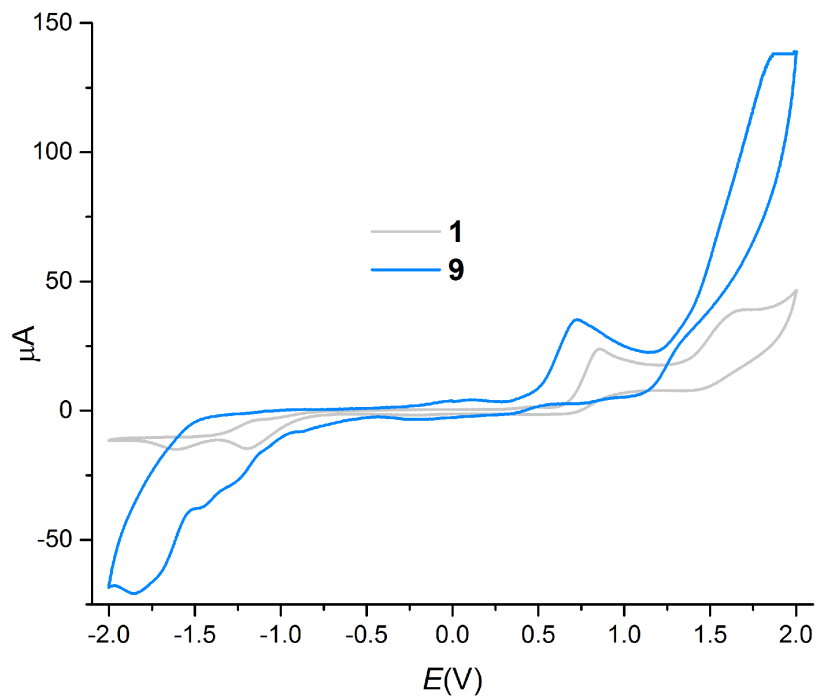

**Figure S11.** Cyclic voltammogram of compound **9** and ligand **1** in  $\text{CH}_2\text{Cl}_2$  with 0.1 M  $[\text{NBu}_4][\text{ClO}_4]$  at a scan rate of  $0.05 \text{ V s}^{-1}$ .

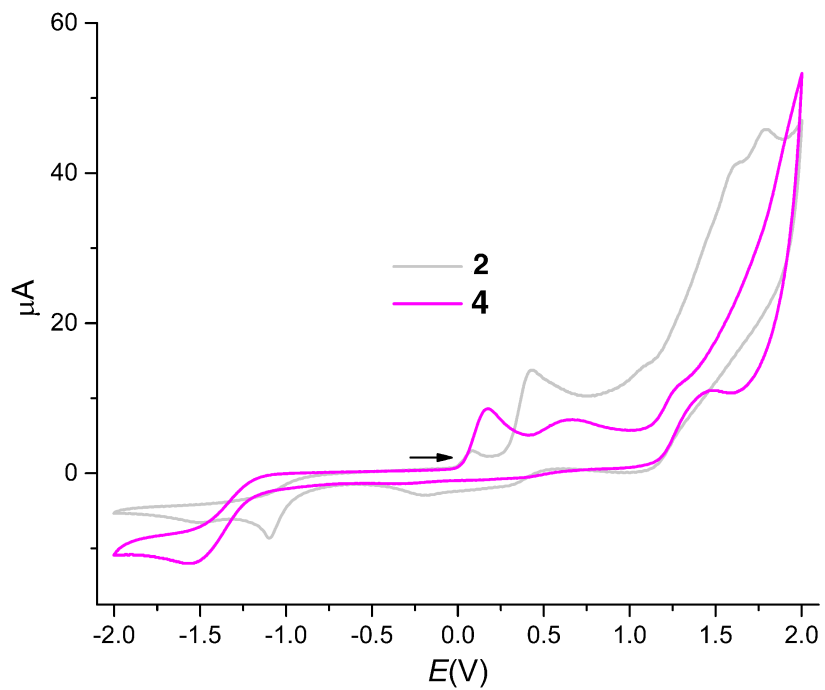

**Figure S12.** Cyclic voltammogram of compound **4** and ligand **2** in  $\text{CH}_2\text{Cl}_2$  with 0.1 M  $[\text{NBu}_4][\text{ClO}_4]$  at a scan rate of  $0.05 \text{ V s}^{-1}$ .

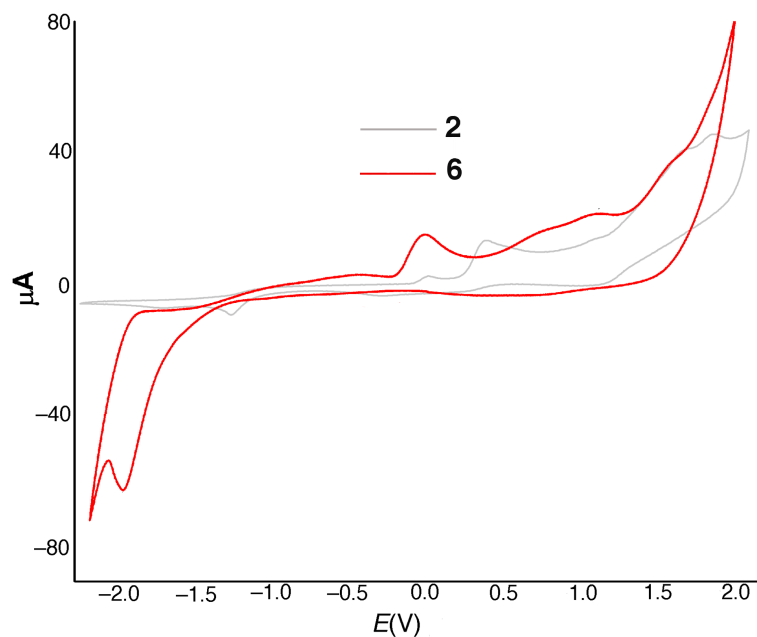

**Figure S13.** Cyclic voltammogram of compound **6** and ligand **2** in CH<sub>2</sub>Cl<sub>2</sub> with 0.1 M [NBu<sub>4</sub>][ClO<sub>4</sub>] at a scan rate of 0.05 V s<sup>-1</sup>.

**Table S5.** Crystal data and structure refinement details for compounds **8–10**

|                                                                                                                | <b>8</b> ·2.632THF·2.369CH <sub>2</sub> Cl <sub>2</sub>                                                                       | <b>9</b> ·5.888THF                                                                                                      | <b>10</b> ·2CH <sub>2</sub> Cl <sub>2</sub>                                                                                 |
|----------------------------------------------------------------------------------------------------------------|-------------------------------------------------------------------------------------------------------------------------------|-------------------------------------------------------------------------------------------------------------------------|-----------------------------------------------------------------------------------------------------------------------------|
| Empirical formula                                                                                              | C <sub>108.90</sub> H <sub>100.79</sub> Cl <sub>4.74</sub> CuN <sub>9</sub> NiO <sub>2.63</sub> P <sub>7</sub> S <sub>6</sub> | C <sub>105.55</sub> H <sub>115.10</sub> N <sub>10</sub> Ni <sub>2</sub> O <sub>9.89</sub> P <sub>6</sub> S <sub>6</sub> | C <sub>54</sub> H <sub>44</sub> Cl <sub>4</sub> Mo <sub>2</sub> N <sub>6</sub> O <sub>5</sub> P <sub>4</sub> S <sub>4</sub> |
| Formula weight                                                                                                 | 2272.08                                                                                                                       | 2177.61                                                                                                                 | 1442.75                                                                                                                     |
| Space group                                                                                                    | Triclinic                                                                                                                     | Triclinic                                                                                                               | Monoclinic                                                                                                                  |
| Crystal system                                                                                                 | <i>P</i> $\bar{1}$                                                                                                            | <i>P</i> $\bar{1}$                                                                                                      | <i>C2/c</i>                                                                                                                 |
| <i>a</i> /Å                                                                                                    | 16.0347(5)                                                                                                                    | 16.0990(10)                                                                                                             | 27.9452(6)                                                                                                                  |
| <i>b</i> /Å                                                                                                    | 17.7231(6)                                                                                                                    | 16.7130(10)                                                                                                             | 10.2398(2)                                                                                                                  |
| <i>c</i> /Å                                                                                                    | 19.7522(6)                                                                                                                    | 20.6239(12)                                                                                                             | 24.6315(9)                                                                                                                  |
| $\alpha$ /°                                                                                                    | 81.0699(6)                                                                                                                    | 84.1575(13)                                                                                                             | 90                                                                                                                          |
| $\beta$ /°                                                                                                     | 78.5117(6)                                                                                                                    | 73.4498(12)                                                                                                             | 122.6709(7)                                                                                                                 |
| $\gamma$ /°                                                                                                    | 81.7524(6)                                                                                                                    | 79.8242(13)                                                                                                             | 90                                                                                                                          |
| Unit cell volume/Å <sup>3</sup>                                                                                | 5397.3(3)                                                                                                                     | 5227.8(5)                                                                                                               | 5933.2(3)                                                                                                                   |
| Temperature/K                                                                                                  | 100(2)                                                                                                                        | 100(2)                                                                                                                  | 100(2)                                                                                                                      |
| Wavelength/Å                                                                                                   | 0.71073                                                                                                                       | 0.71073                                                                                                                 | 0.71073                                                                                                                     |
| <i>Z</i>                                                                                                       | 2                                                                                                                             | 2                                                                                                                       | 4                                                                                                                           |
| $\rho$ (calc.)/g cm <sup>-3</sup>                                                                              | 1.401                                                                                                                         | 1.389                                                                                                                   | 1.615                                                                                                                       |
| $\mu$ (mm <sup>-1</sup> )                                                                                      | 0.763                                                                                                                         | 0.635                                                                                                                   | 0.904                                                                                                                       |
| Crystal size/mm <sup>3</sup>                                                                                   | 0.21 x 0.15 x 0.14                                                                                                            | 0.27 x 0.16 x 0.10                                                                                                      | 0.14 x 0.13 x 0.12                                                                                                          |
| Refl. collected                                                                                                | 99525                                                                                                                         | 96610                                                                                                                   | 42508                                                                                                                       |
| Unique refl. ( <i>R</i> <sub>int</sub> )                                                                       | 24639 (0.0470)                                                                                                                | 23891 (0.0463)                                                                                                          | 6784 (0.0199)                                                                                                               |
| <i>R</i> <sub>1</sub> , <sup>a</sup> <i>wR</i> <sub>2</sub> <sup>b</sup> ( <i>I</i> > 2 $\sigma$ ( <i>I</i> )) | 0.0390, 0.0932                                                                                                                | 0.0382, 0.0872                                                                                                          | 0.0220, 0.0564                                                                                                              |
| <i>R</i> <sub>1</sub> , <sup>a</sup> <i>wR</i> <sub>2</sub> <sup>b</sup> (all data)                            | 0.0533, 0.1007                                                                                                                | 0.0511, 0.0936                                                                                                          | 0.0234, 0.0574                                                                                                              |
| Goof                                                                                                           | 1.023                                                                                                                         | 1.021                                                                                                                   | 1.065                                                                                                                       |

<sup>a</sup> $R_1 = \sum ||F_o| - |F_c|| / \sum |F_o|$ . <sup>b</sup> $wR_2 = [\sum w(F_o^2 - F_c^2)^2 / \sum (F_o^2)^2]^{1/2}$
